# Supplementary material
Source: MDPI journal article supplement (https://www.mdpi.com/1996-1073/16/21/7324)
Supplement: s1 [file s1]

This supplementary material shows the FMECA look up table used in to determine the action priority numbers (AP) computed in the structural section of this manuscript. The information on the tables is based on the FMEA handbook.

Figure S1: FMECA look up table

| Severity  | Occurrence           | Detection            | Action Priority |
|-----------|----------------------|----------------------|-----------------|
| Very high | Very high            | Very high – high     | High            |
|           |                      | Medium               | High            |
|           |                      | Low                  | High            |
|           | High                 | Very low             | High            |
|           |                      | Very high – high     | High            |
|           |                      | Medium               | High            |
|           | Medium               | Low                  | High            |
|           |                      | Very low             | High            |
|           |                      | Very high – high     | High            |
| High      | Low                  | Medium               | High            |
|           |                      | Low                  | High            |
|           |                      | Very low             | Medium          |
|           | Very low             | Very high – high     | High            |
|           |                      | Medium               | Medium          |
|           |                      | Low                  | Low             |
|           | Very high – very low | Very low             | Low             |
|           |                      | Very high – very low | Low             |
|           |                      | Very high – very low | Low             |
| Low       | Very high            | Very high – high     | High            |
|           |                      | Medium               | High            |
|           |                      | Low                  | High            |
|           | High                 | Very low             | High            |
|           |                      | Very high – high     | High            |
|           |                      | Medium               | High            |
|           | Medium               | Low                  | High            |
|           |                      | Very low             | Medium          |
|           |                      | Very high – high     | High            |
| Very low  | Medium               | Medium               | Medium          |
|           |                      | Low                  | Medium          |
|           |                      | Very low             | Medium          |
|           | Low                  | Very high – high     | Medium          |
|           |                      | Medium               | Medium          |
|           |                      | Low                  | Low             |
|           | Very high – very low | Very low             | Low             |
|           |                      | Very high – very low | Low             |
|           |                      | Very high – very low | Low             |

Figure S2: FMECA look up table - Continuation

| Severity | Occurrence | Detection            | Action Priority |
|----------|------------|----------------------|-----------------|
| Medium   | Very high  | Very high – high     | High            |
|          |            | Medium               | High            |
|          |            | Low                  | Medium          |
|          |            | Very low             | Medium          |
|          | High       | Very high – high     | Medium          |
|          |            | Medium               | Medium          |
|          |            | Low                  | Medium          |
|          |            | Very low             | Low             |
|          | Medium     | Very high – high     | Medium          |
|          |            | Medium               | Low             |
|          |            | Low                  | Low             |
|          |            | Very low             | Low             |
| Low      | Low        | Very high – high     | Low             |
|          |            | Medium               | Low             |
|          |            | Low                  | Low             |
|          |            | Very low             | Low             |
|          | Very low   | Very high – very low | Low             |
|          |            | Very high – high     | Medium          |
|          |            | Medium               | Medium          |
|          |            | Low                  | Low             |
|          | High       | Very low             | Low             |
|          |            | Very high – high     | Low             |
|          |            | Medium               | Low             |
|          |            | Low                  | Low             |
|          | Medium     | Very low             | Low             |
|          |            | Very high – high     | Low             |
|          |            | Medium               | Low             |
|          |            | Low                  | Low             |
|          | Low        | Very low             | Low             |
|          |            | Very high – high     | Low             |
|          |            | Medium               | Low             |
|          |            | Low                  | Low             |
|          | Very low   | Very low             | Low             |
|          |            | Very high – very low | Low             |
|          |            | Very high – very low | Low             |
|          |            | Very high – very low | Low             |
